# Supplementary material for: Development of a sequential workflow based on LC-PRM for the verification of endometrial cancer protein biomarkers in uterine aspirate samples
Source: PubMed Central journal article supplement (PMC5288171; doi:10.18632/oncotarget.10632), 2016-07-16
Supplement: oncotarget-07-53102-s001.pdf [file oncotarget-07-53102-s001.pdf]

# Development of a sequential workflow based on LC-PRM for the verification of endometrial cancer protein biomarkers in uterine aspirate samples

## Supplementary Materials

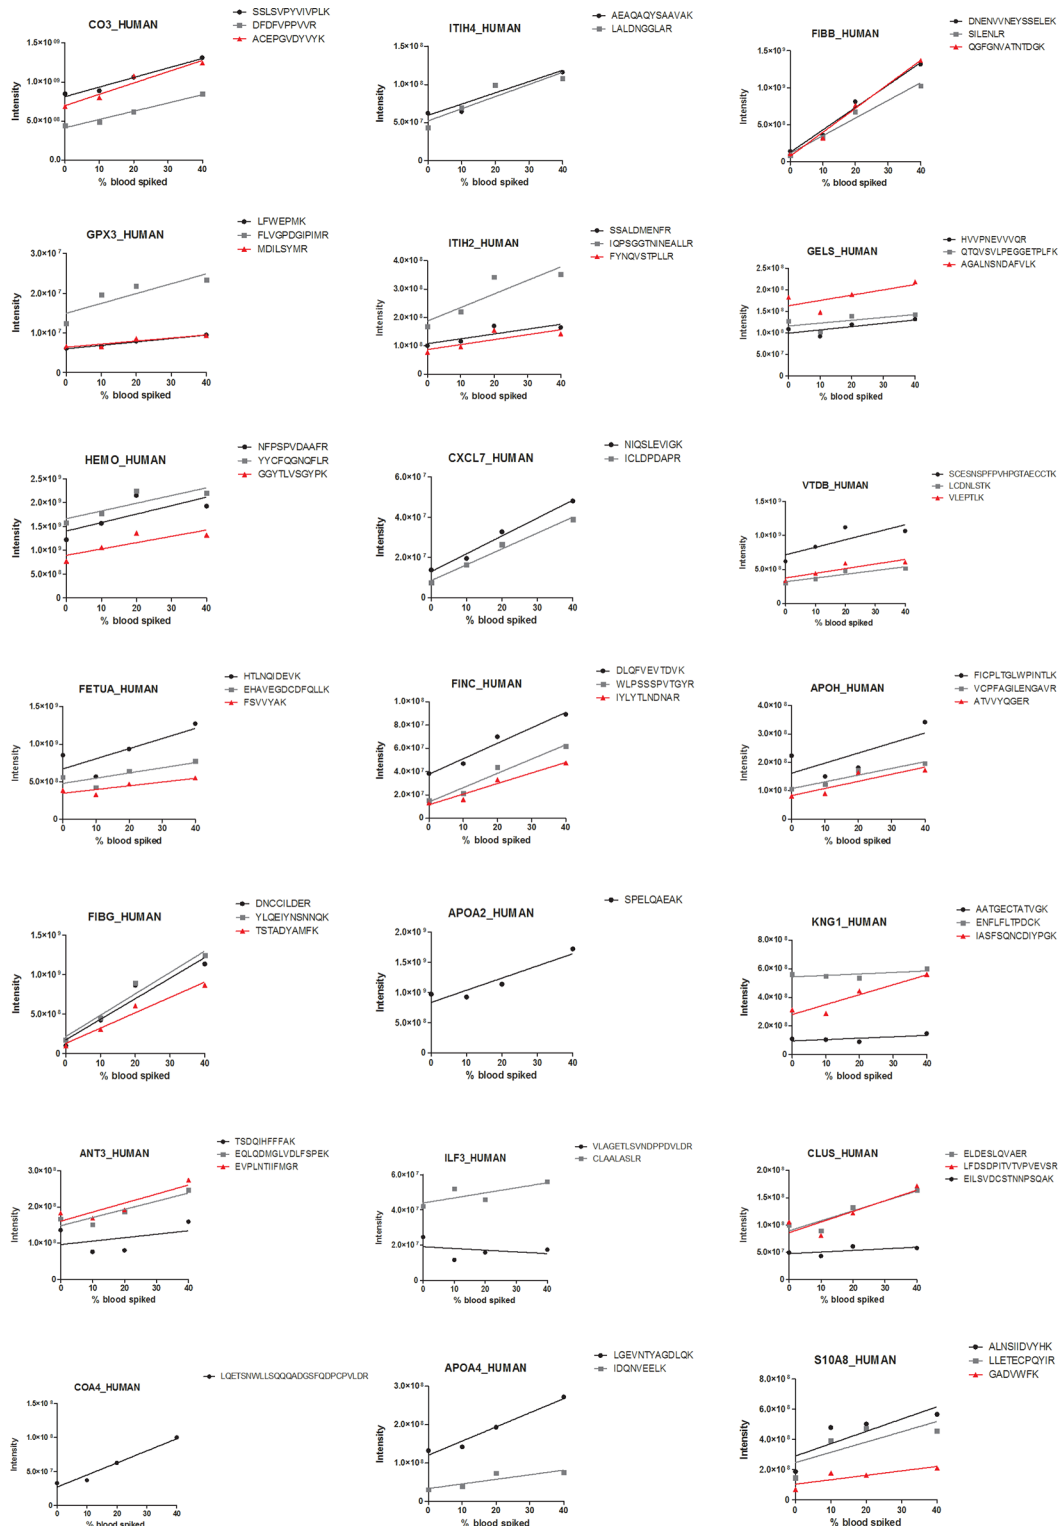

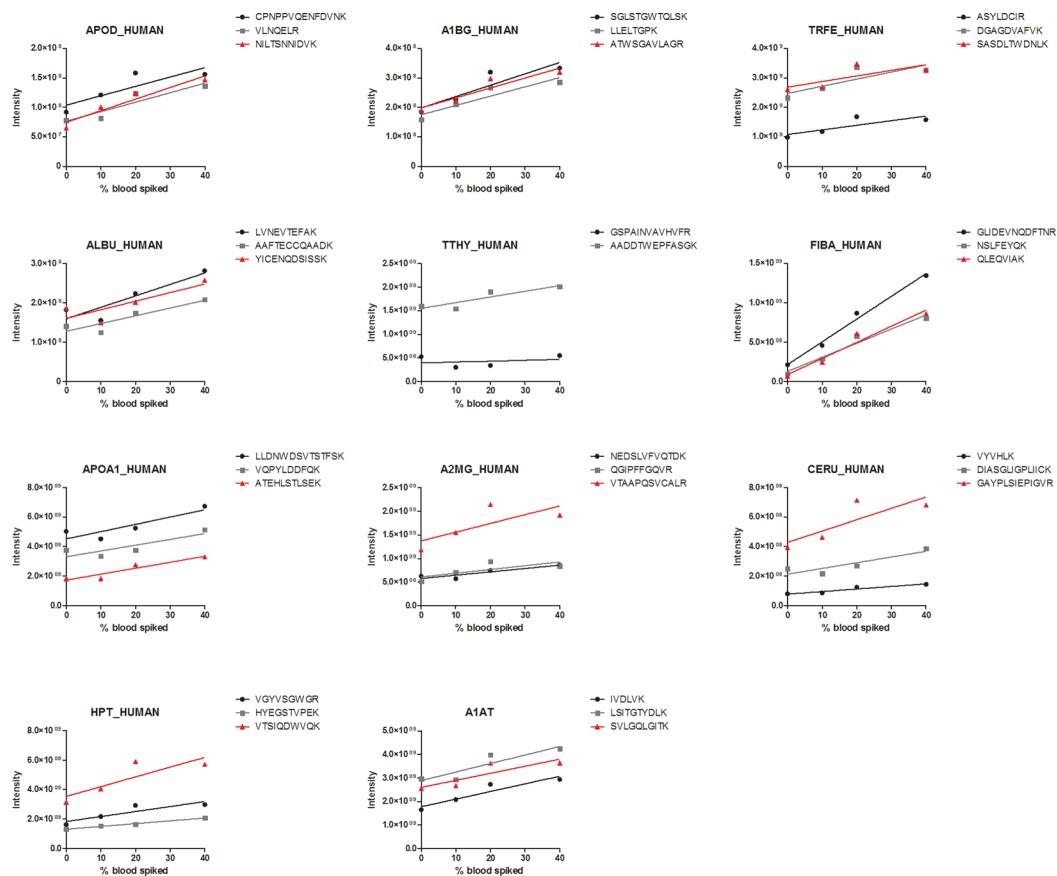

**Supplementary Figure S1: Biomarker candidates rejected from the study due to their high abundance in blood.** Concentration profile of the peptides coming from 32 proteins showing increasing expression profiles when uterine aspirate samples were diluted with increasing amount of full blood (0, 10, 20, 40% (v/v)).

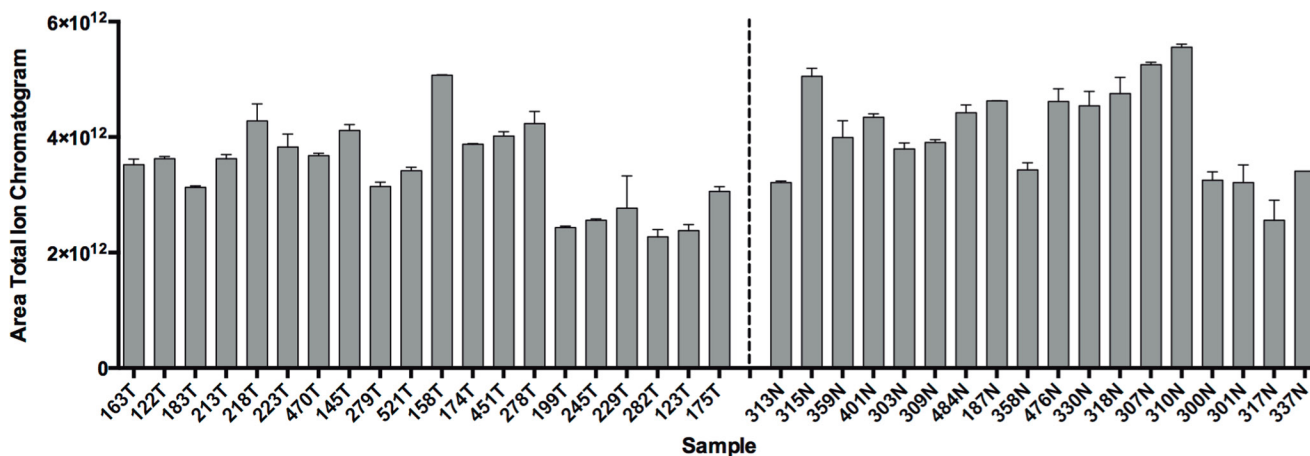

**Supplementary Figure S2: TIC of each injected sample to control the total amount of protein injected.** Area of the total ion current chromatogram (TIC) of the samples. Samples 199T to 175T and 300N to 337N were acquired in a different batch. T, endometrial cancer patients; N, control women.

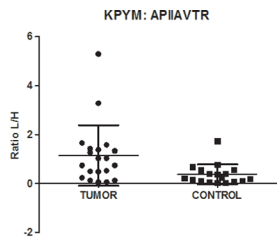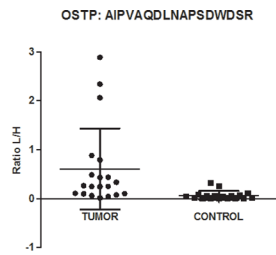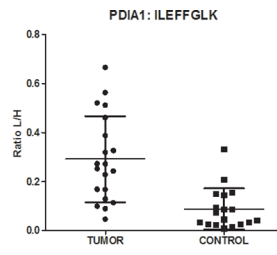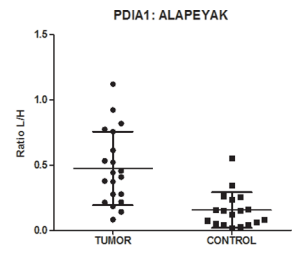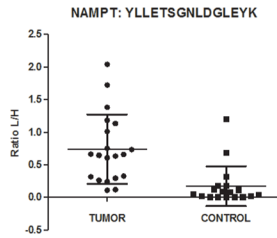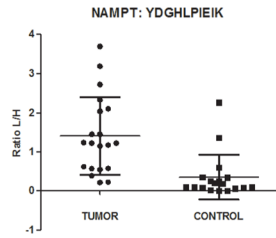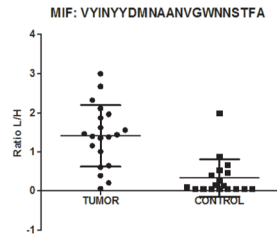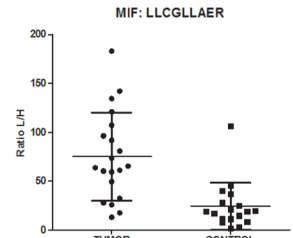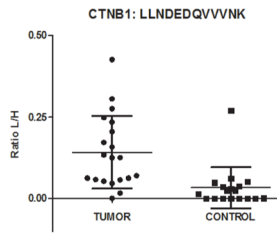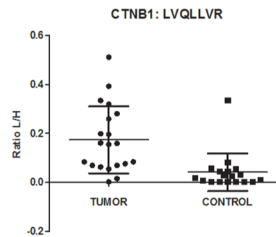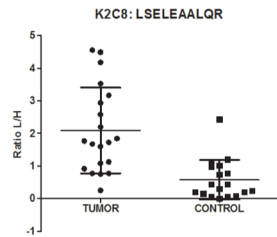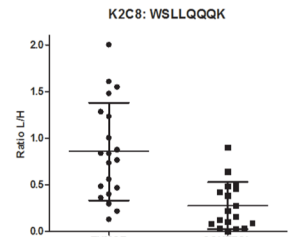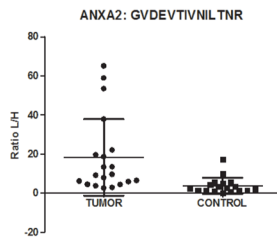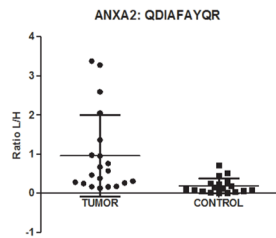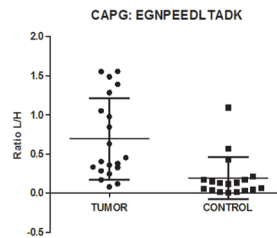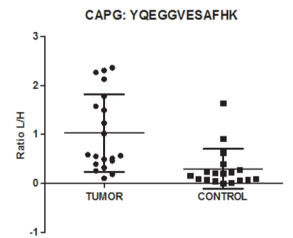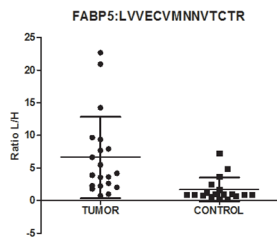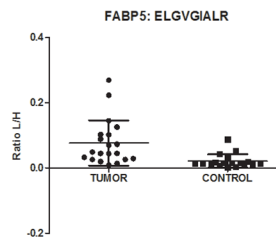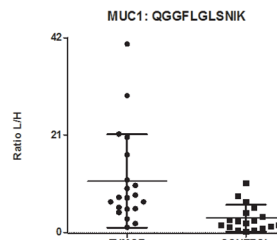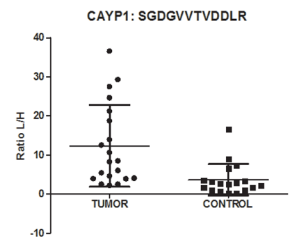

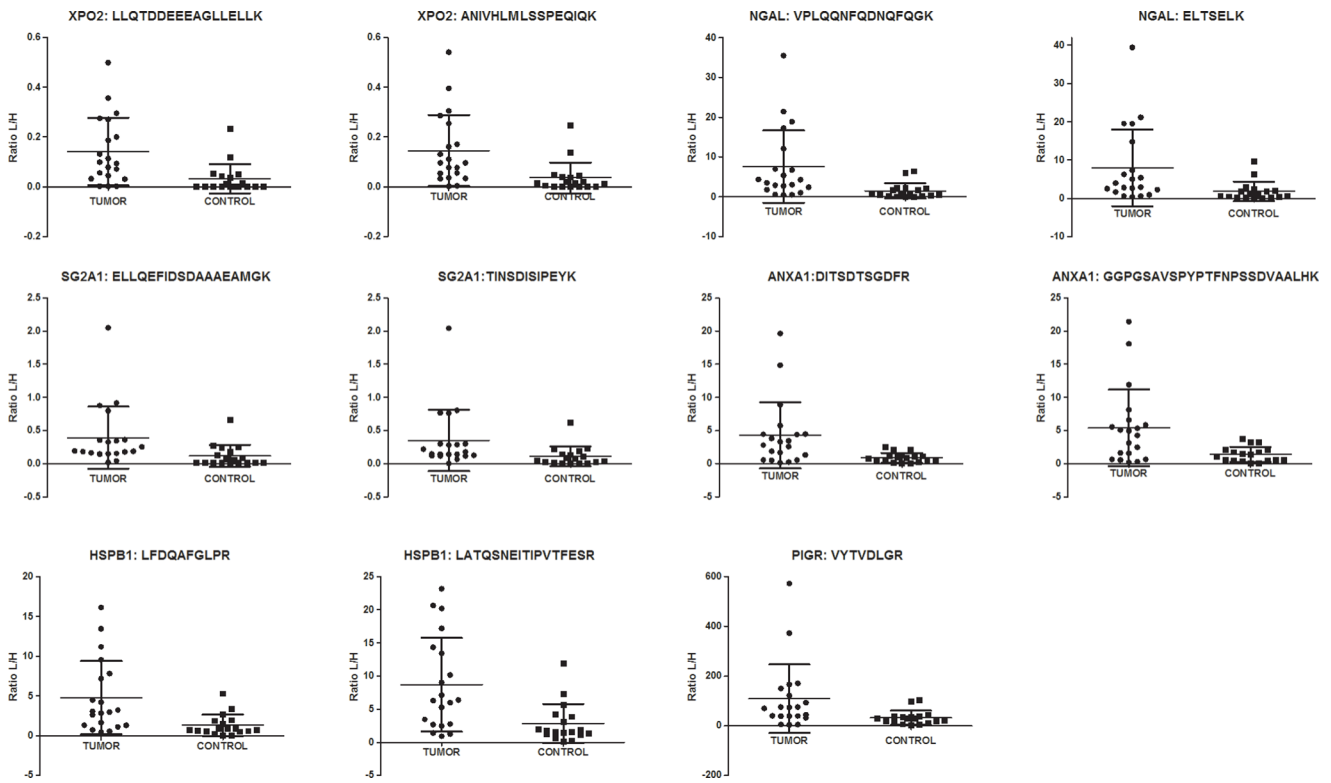

**Supplementary Figure S3: Scattering plots of the expression of 31 peptides coming from the 16 differentially expressed biomarkers with AUC between 0.75-0.89.** Scattering plots depicting the light/heavy (L/H) ratios across the 20 EC patients and 18 controls of the 16 differentially expressed biomarkers not shown in Figure 4 ( $p$ -value<0.05 and fold change higher than 3; AUC below 0.9).

**Supplementary Table S1: List of proteins and related peptides detected by DDA analysis in uterine aspirates samples.** In bold, the 158 proteins identified out of the initial list of 506 biomarker candidates. See Supplementary\_File\_S1

**Supplementary Table S2: List of precursors and related fragment ions extracted from PRM acquisition.** See Supplementary\_File\_S2

**Supplementary Table S3: Raw integration data extracted from Skyline (area ratio L/H).** See Supplementary\_File\_S3

**Supplementary Table S4: Cleansed integration data, mean of duplicates (area ratio L/H).** See Supplementary\_File\_S4

**Supplementary Table S5: Clinico-pathological characteristics of the 42 women enrolled in the study.** DDA, data-dependent acquisition; PRM, parallel-reaction monitoring. See Supplementary\_File\_S5
